# Supplementary material
Source: MDPI journal article supplement (https://www.mdpi.com/2410-390X/4/3/20)
Supplement: s1 [file s1]

Archive with 3 entries (3 files):
- instruments-859256-tex.zip
- instruments-859256.pdf
- instruments-859256.zip
