# Supplementary material
Source: MDPI journal article supplement (https://www.mdpi.com/2410-390X/4/3/20)

10"

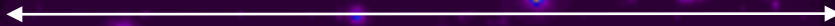

IRS7, K=6.5,  
5.57" separation,  
AO wavefront  
reference

VLTI 2"  
FoV

IRS16NW, K=10.0,  
1.21" separation,  
guide star  
(for tip-tilt residual)

IRS16C, K=9.7,  
1.23" separation,  
fringe tracking  
phase reference

Galactic Center  
Black Hole,  
science object

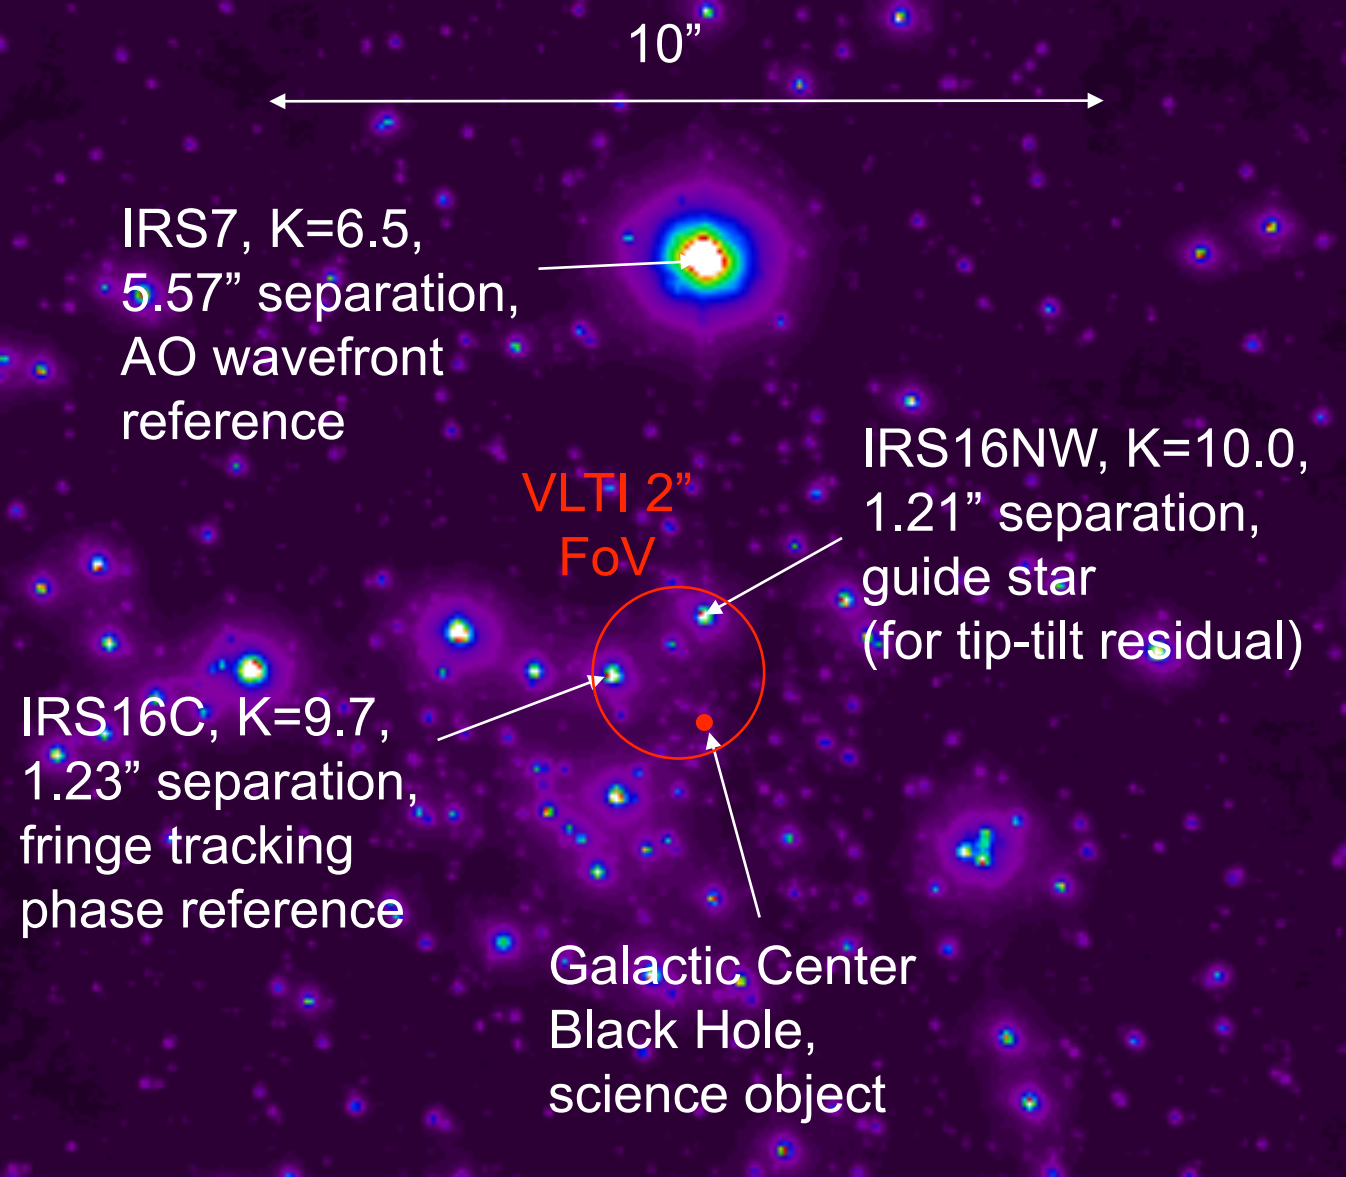

Supplement: s1 [file s1]
