# Supplementary material
Source: MDPI journal article supplement (https://www.mdpi.com/2410-390X/4/3/20)

CIAO#1 gc1  $\langle \text{RMS\_cen\_y} \rangle = 9.5 \text{ mas}$ 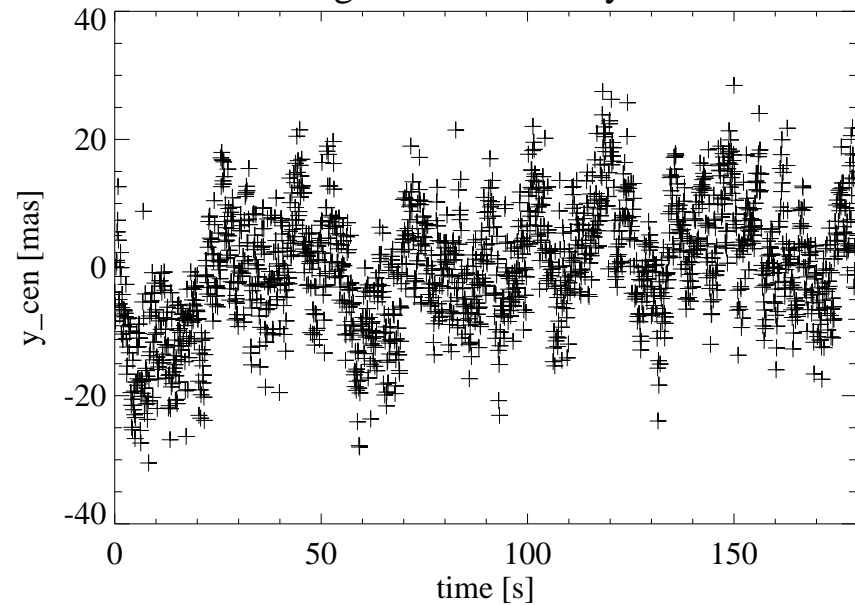CIAO#2 gc1  $\langle \text{RMS\_cen\_y} \rangle = 9.3 \text{ mas}$ 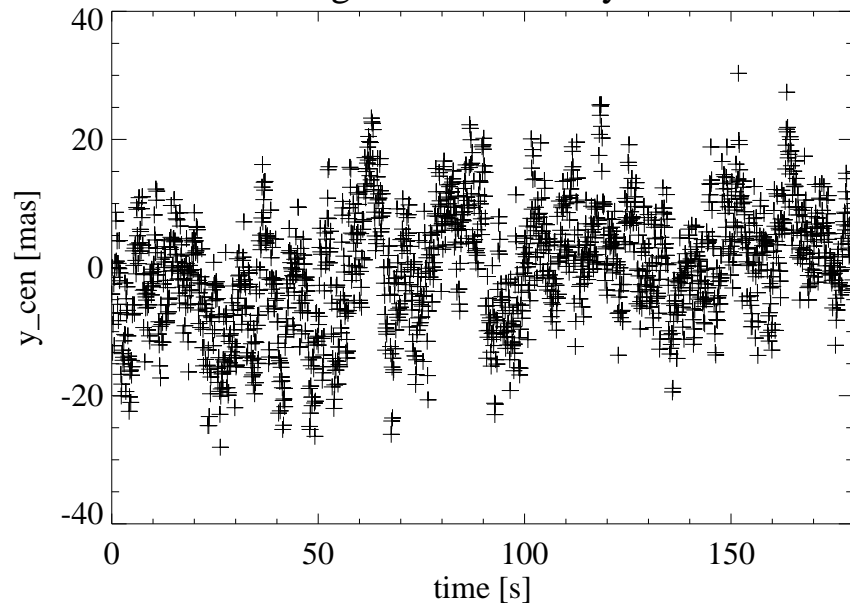CIAO#3 gc1  $\langle \text{RMS\_cen\_y} \rangle = 6.4 \text{ mas}$ 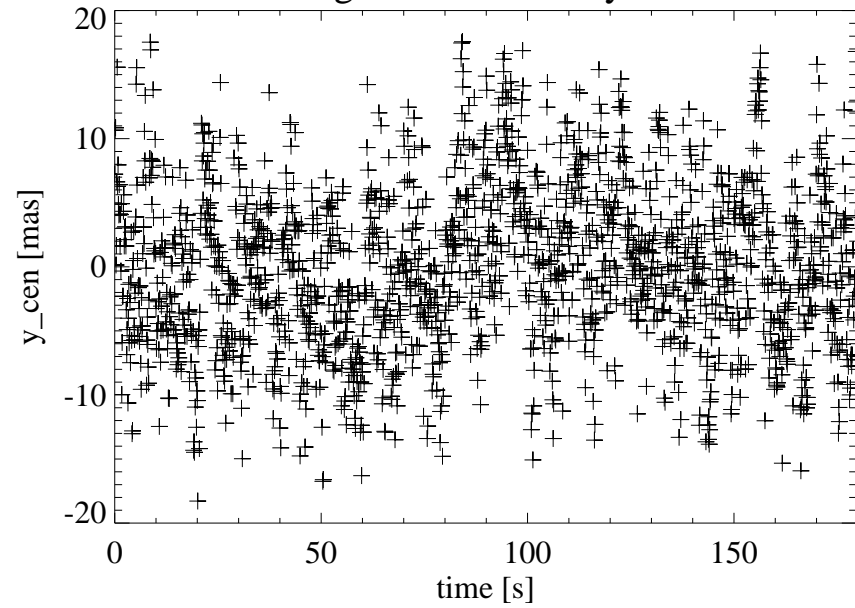CIAO#4 gc1  $\langle \text{RMS\_cen\_y} \rangle = 8.6 \text{ mas}$ 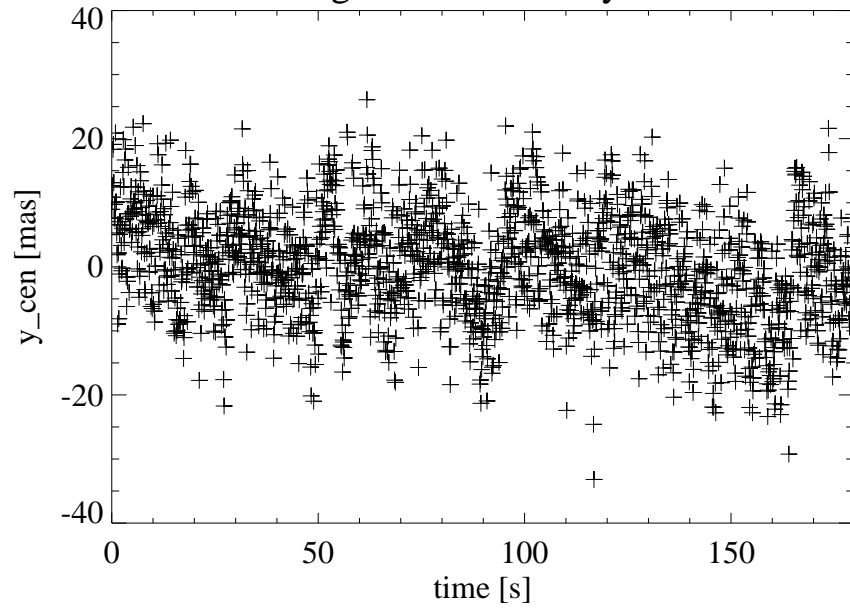

Supplement: s1 [file s1]
