# Supplementary material
Source: MDPI journal article supplement (https://www.mdpi.com/2410-390X/4/3/20)

# CIAO optical path

AOMS folding mirrors

AOMS off-axis  
STS Beam B

AOMS on-axis  
STS Beam A

cryogenic environment

De-rotator

Entrance  
window

Focal mask &  
field lens

Achromatic  
lenses

Filter  
wheel

Lenslet array &  
detector

Fold  
mirror

see enlargement

Parabolic mirror

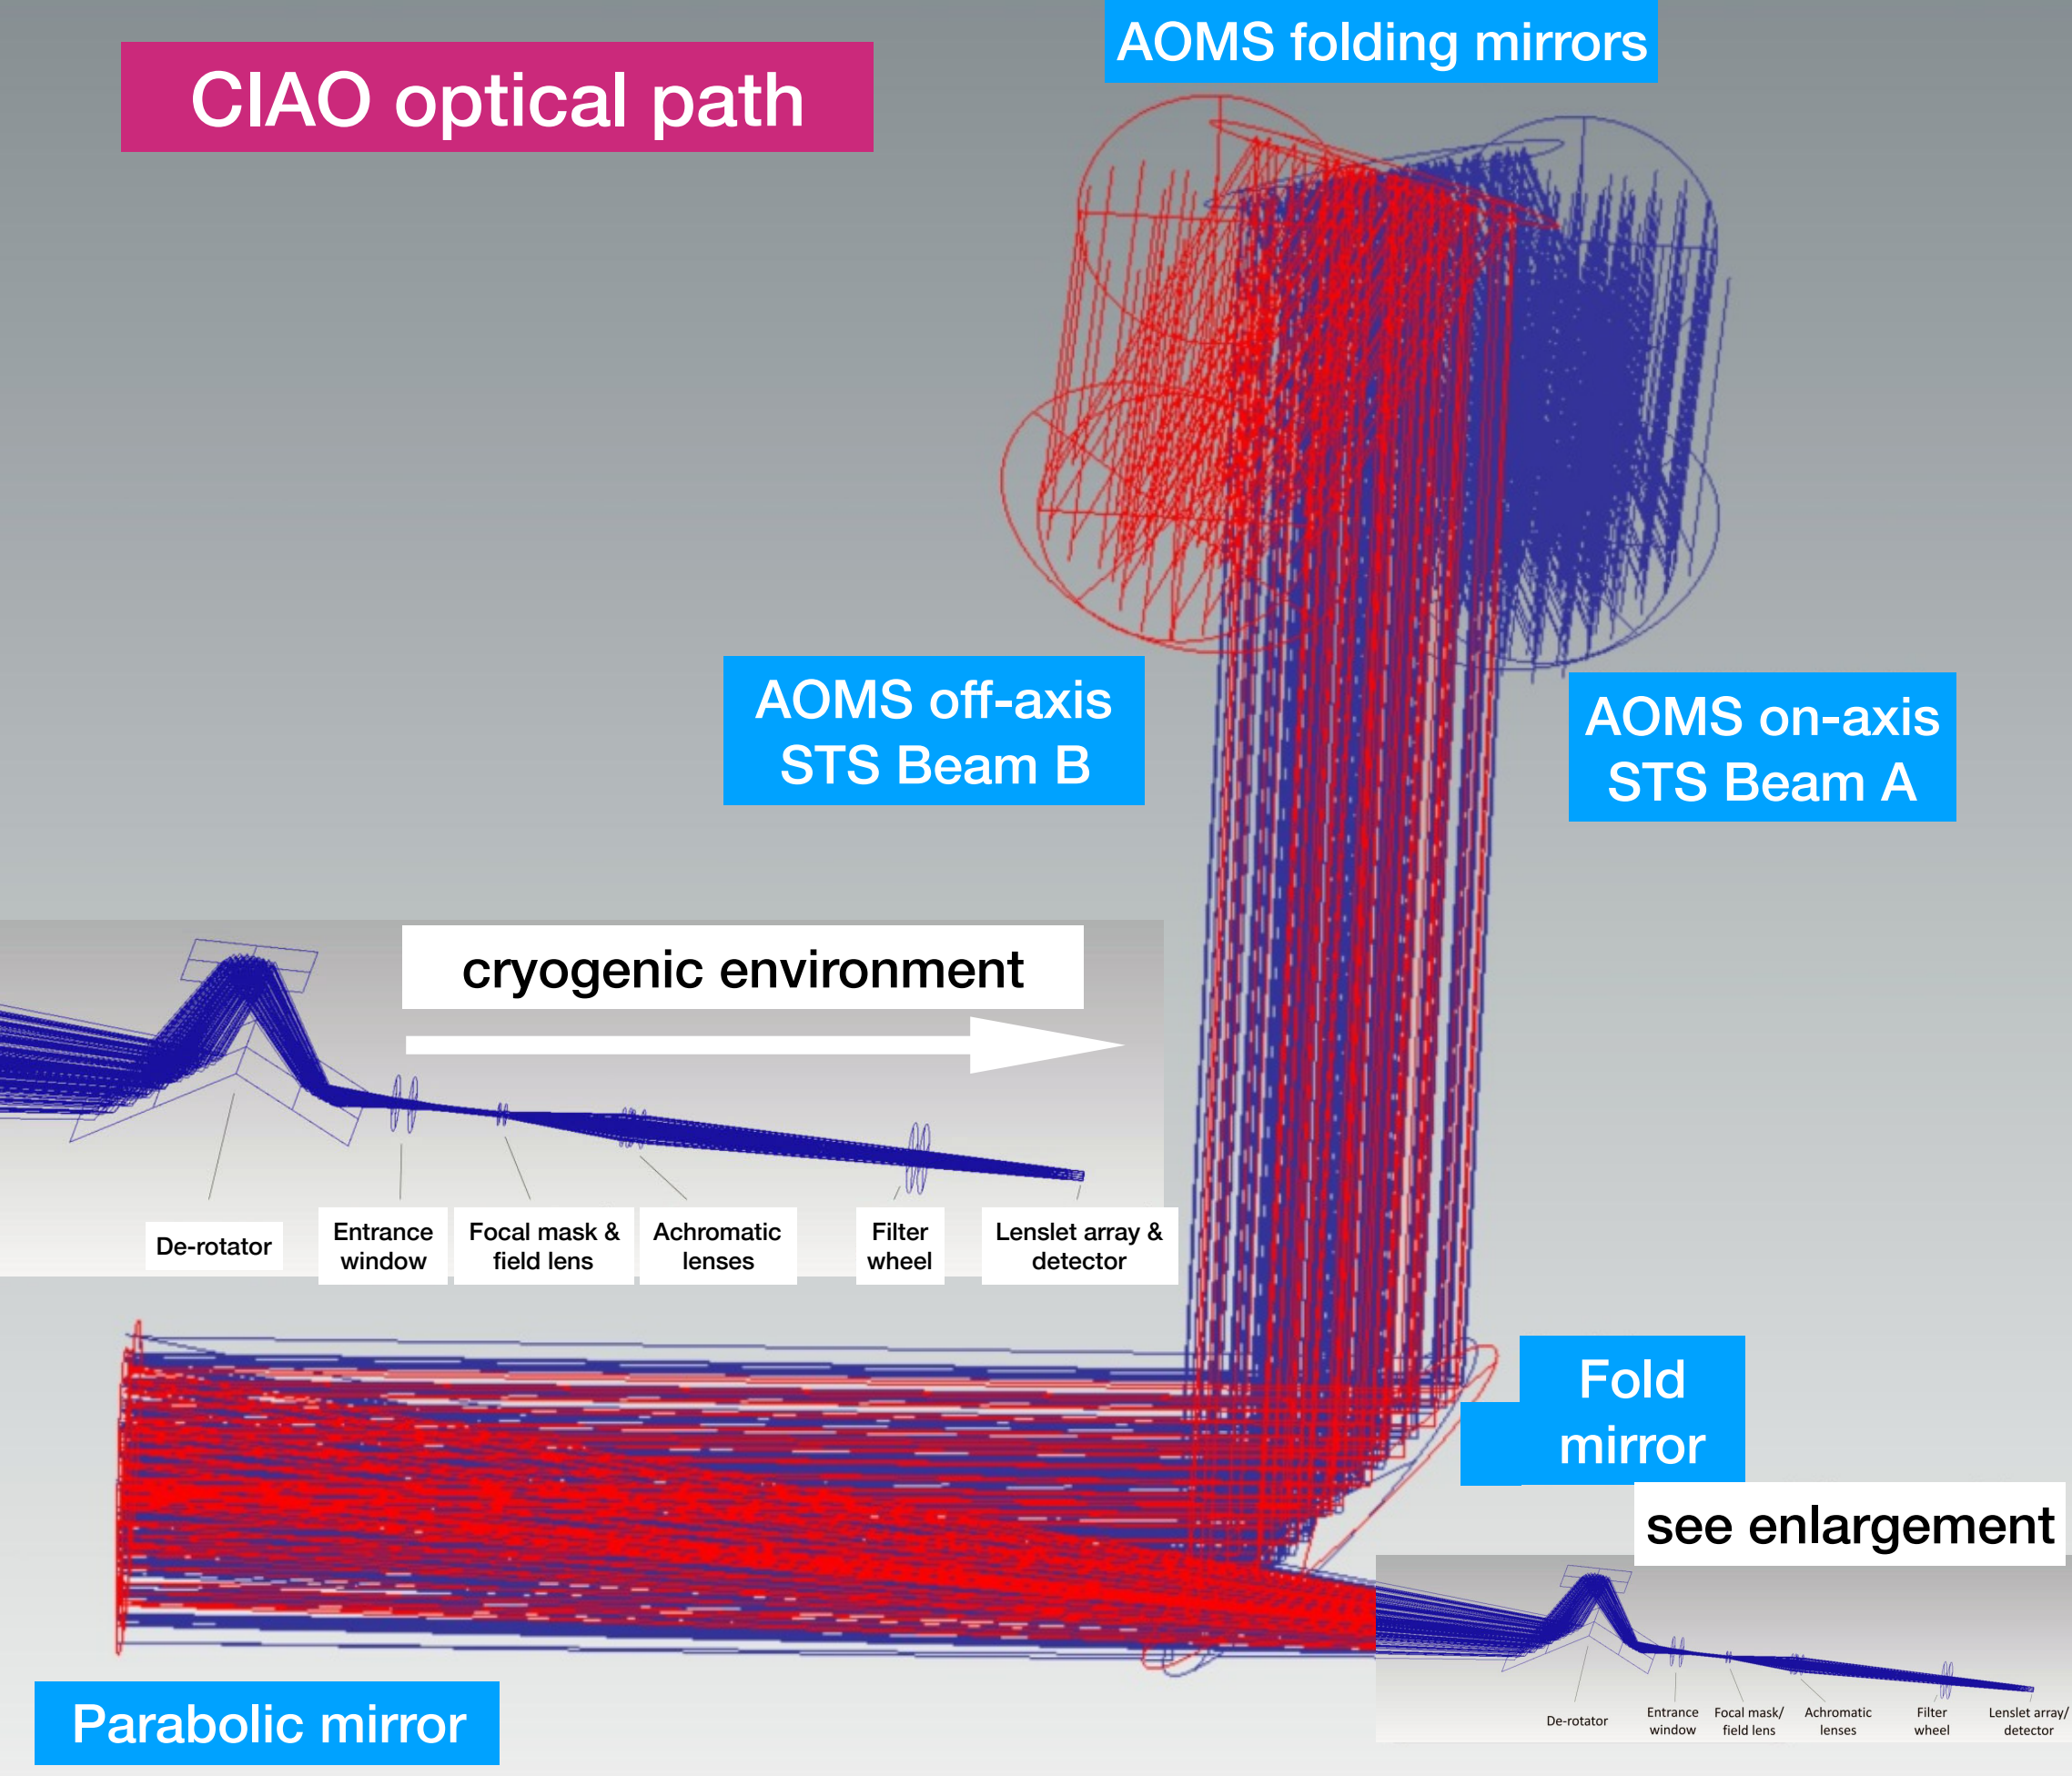

Supplement: s1 [file s1]
