# Supplementary material
Source: MDPI journal article supplement (https://www.mdpi.com/2410-390X/4/3/20)

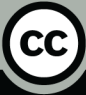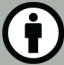

BY

Supplement: s1 [file s1]

CIAO and ASM comparison over 3 years (2017-2019)

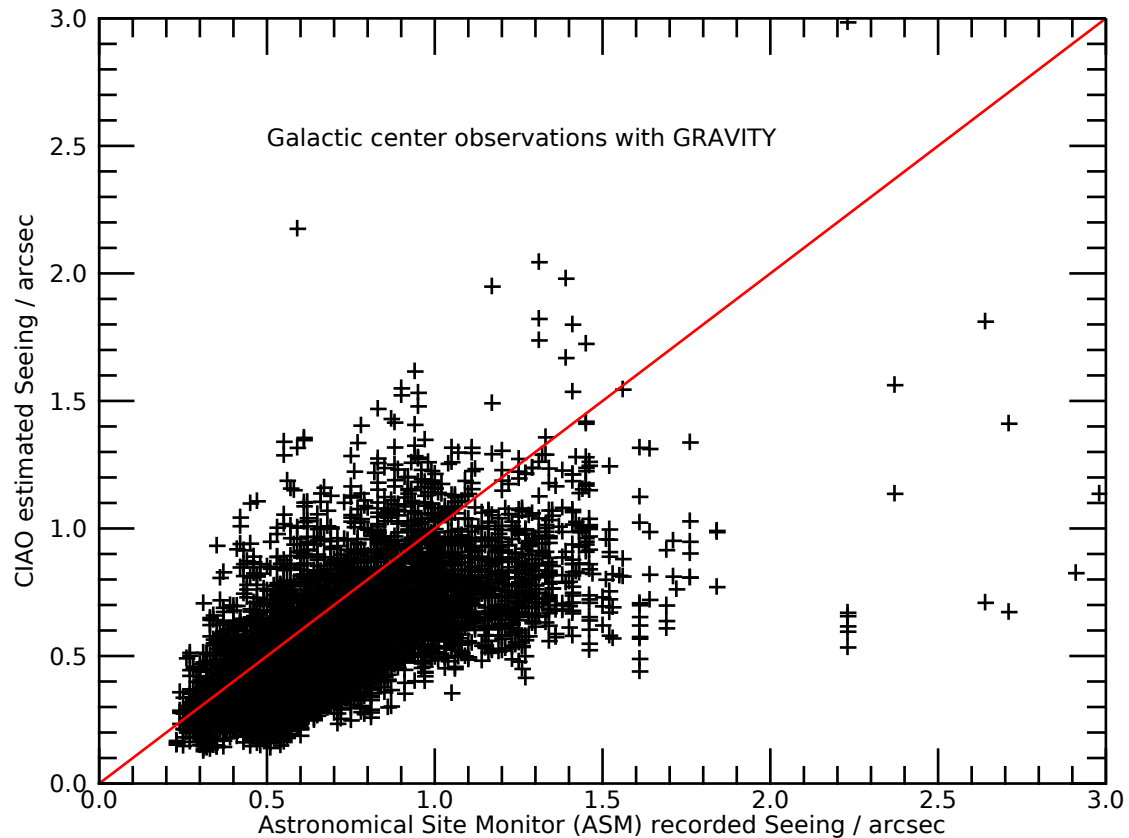

Supplement: s1 [file s1]

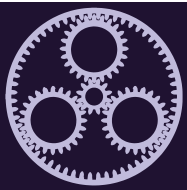

*instruments*

Supplement: s1 [file s1]

VLTI - STS - CIAO optical scheme

M8=MACAO Deformable Mirror  
M9=MACAO VLTi Dichroic Mirror

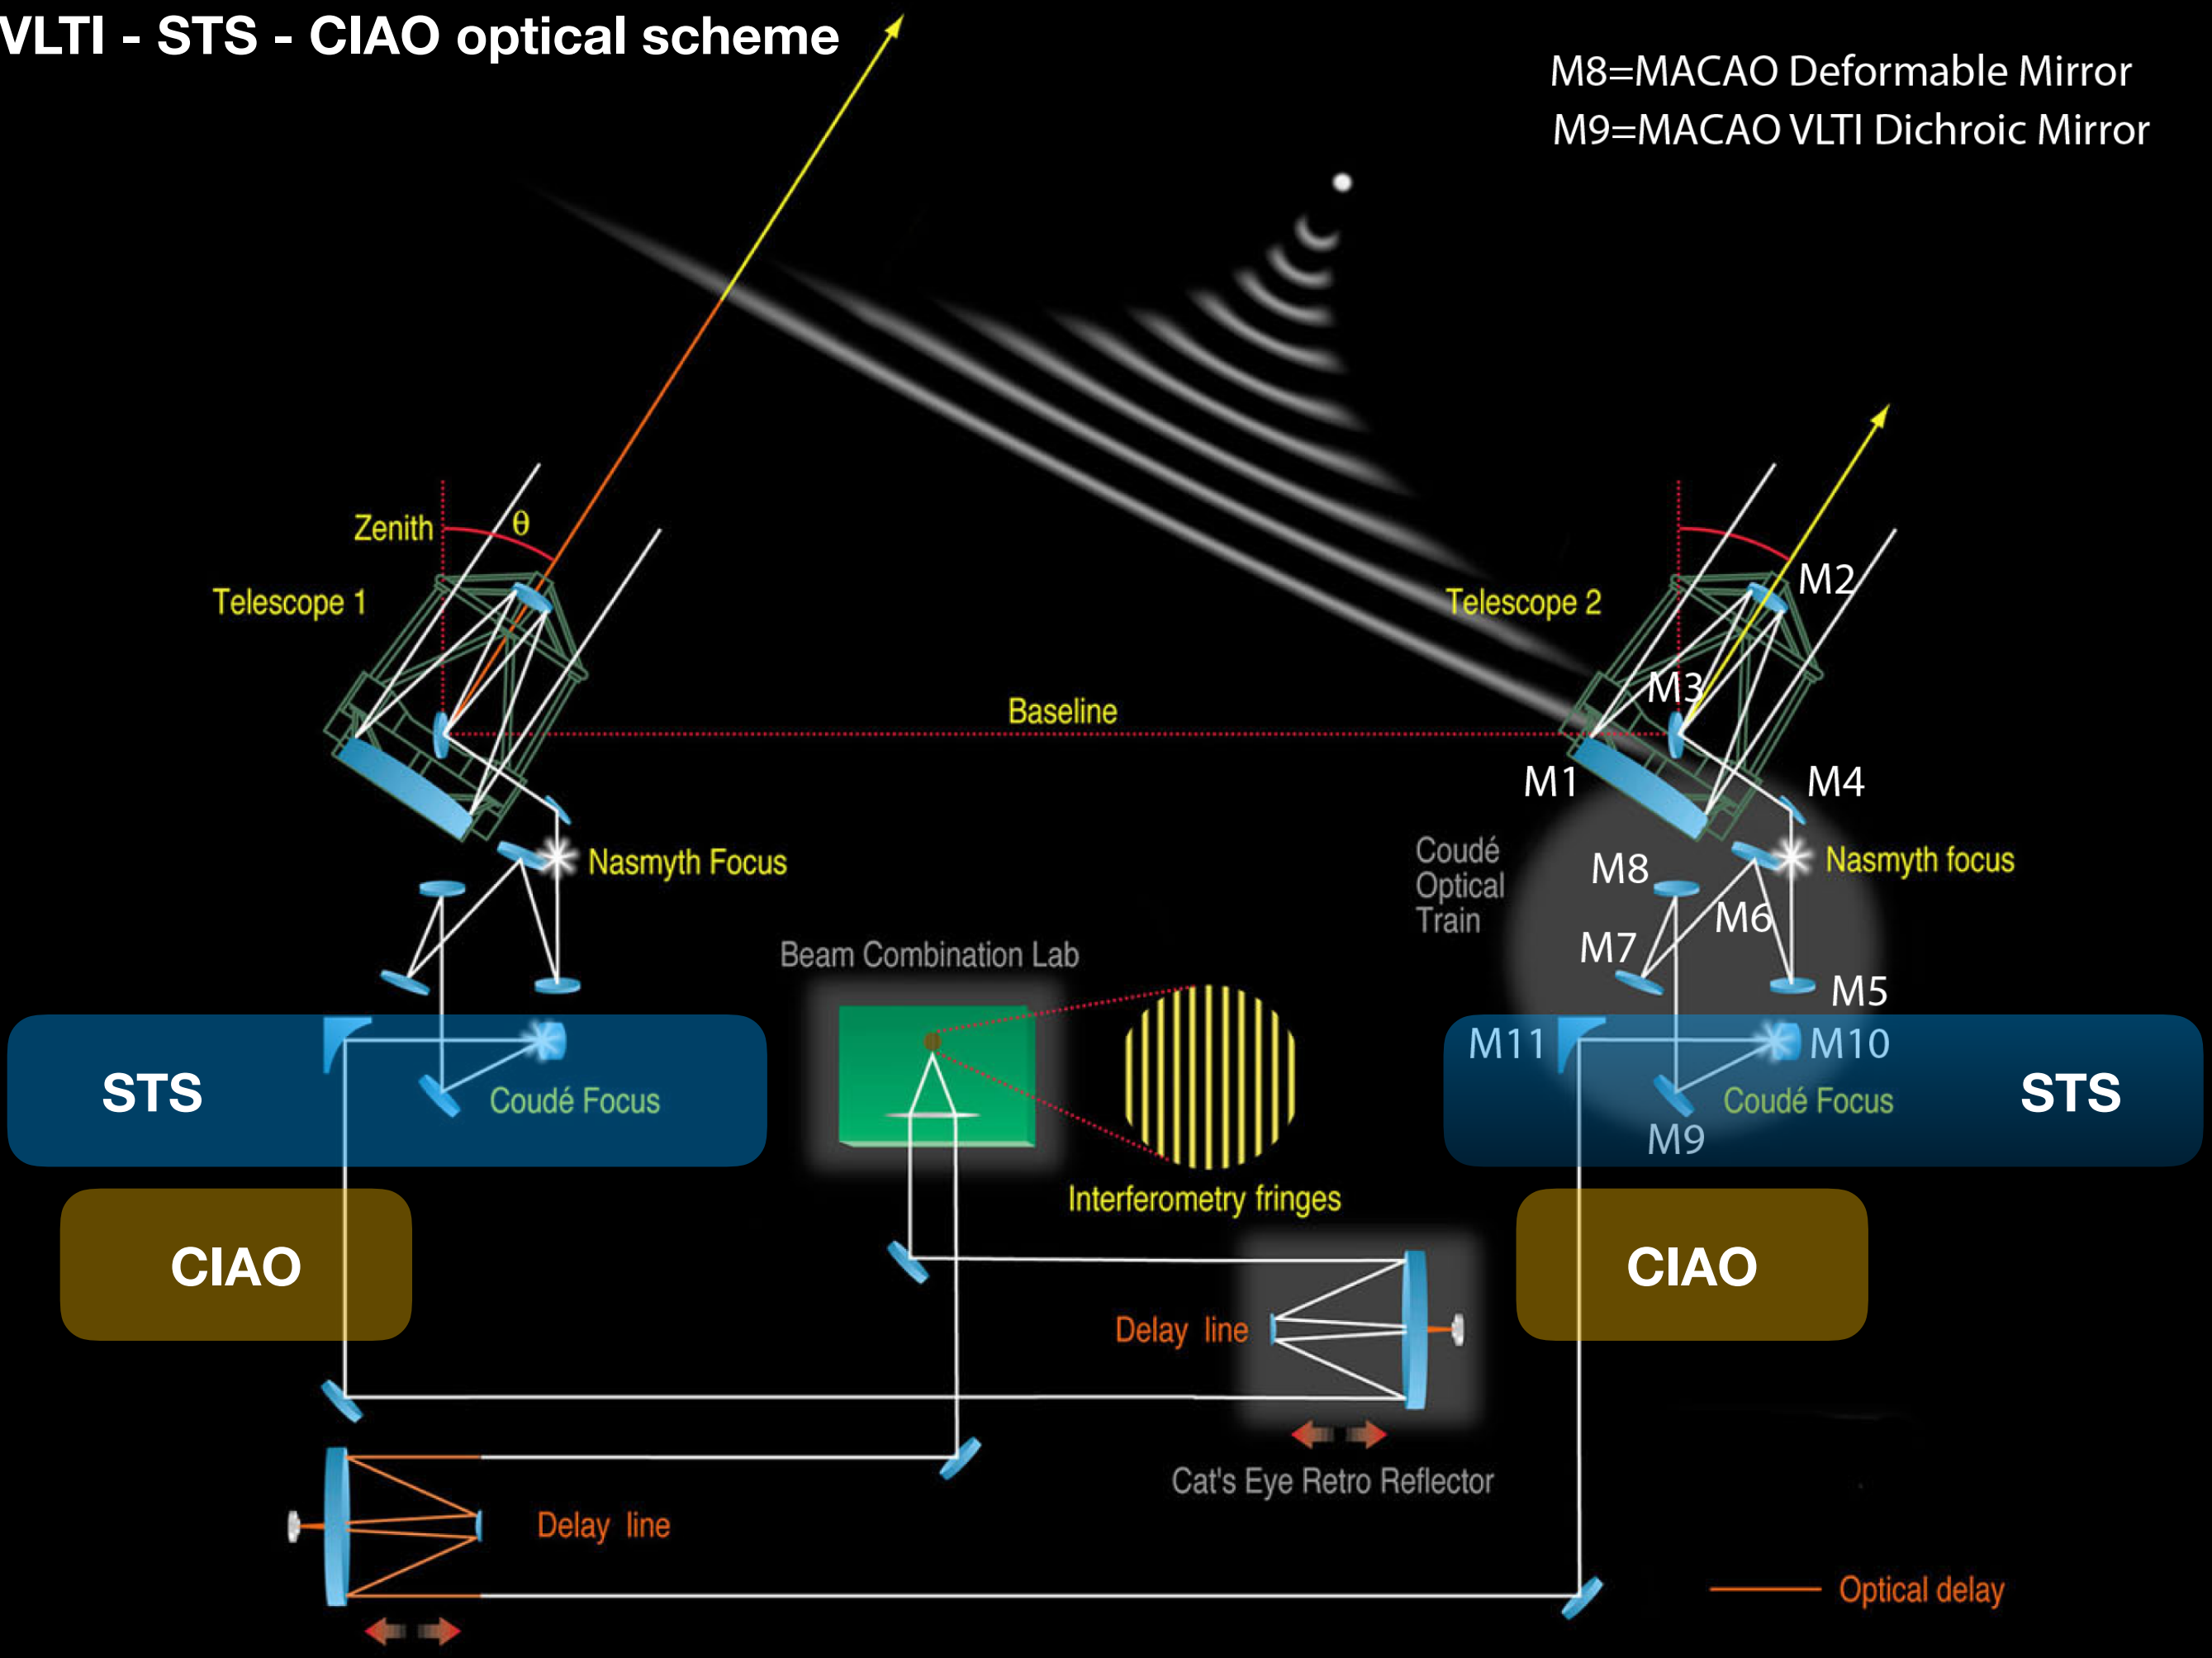

Supplement: s1 [file s1]

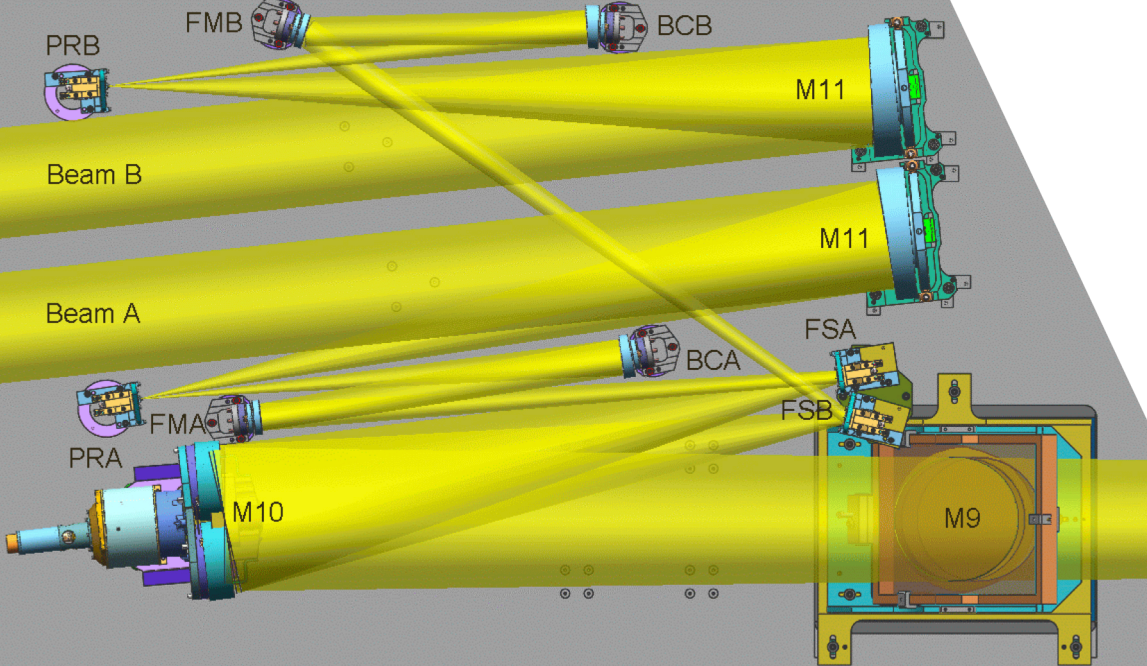

Supplement: s1 [file s1]

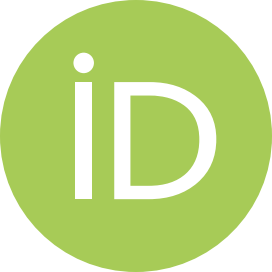

Supplement: s1 [file s1]

CIAO performance over 3 years (2017-2019)

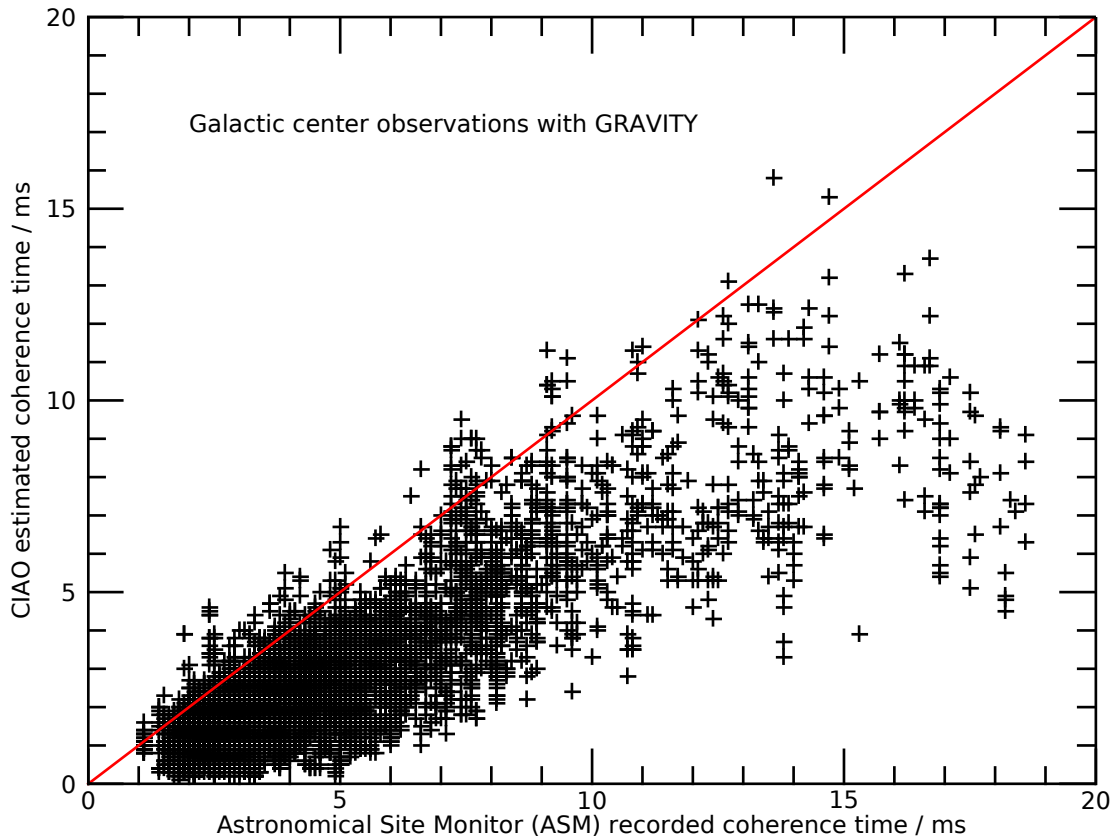

Supplement: s1 [file s1]

CIAO performance histogram over 3 years (2017-2019)

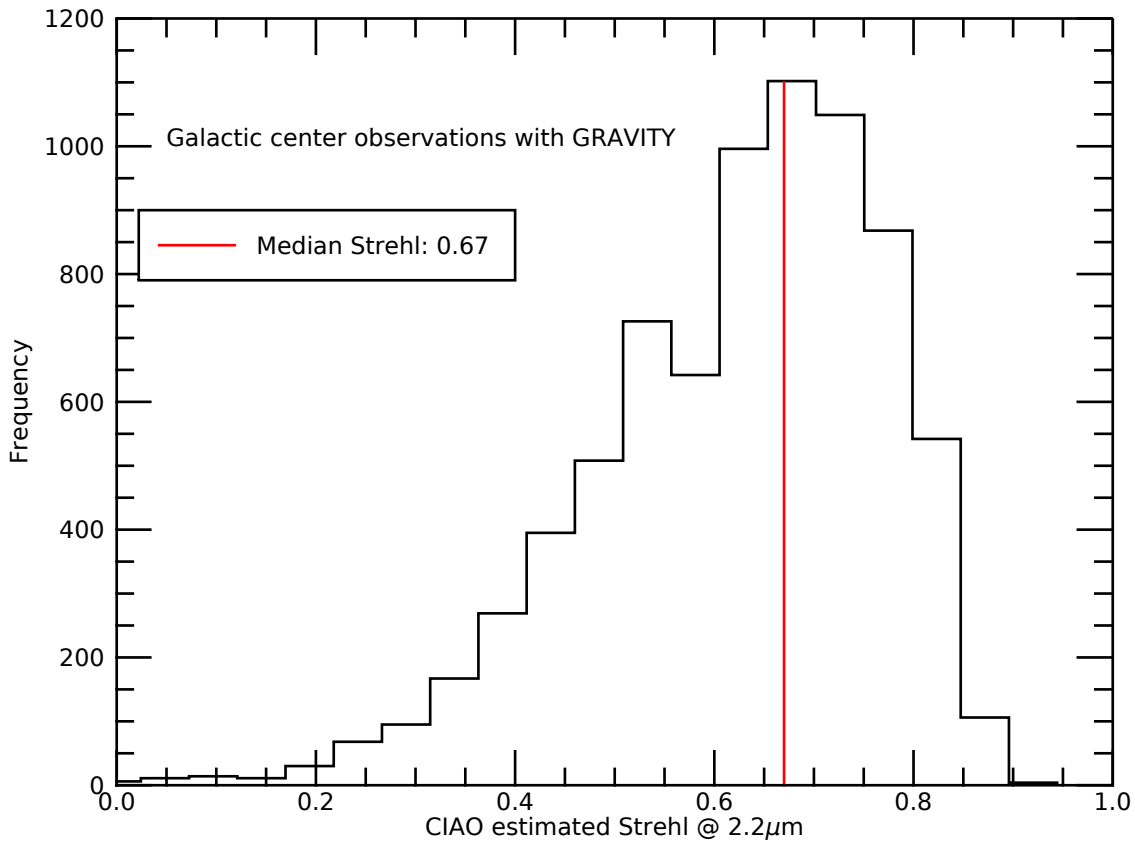

Supplement: s1 [file s1]

CIAO performance over 3 years (2017-2019)

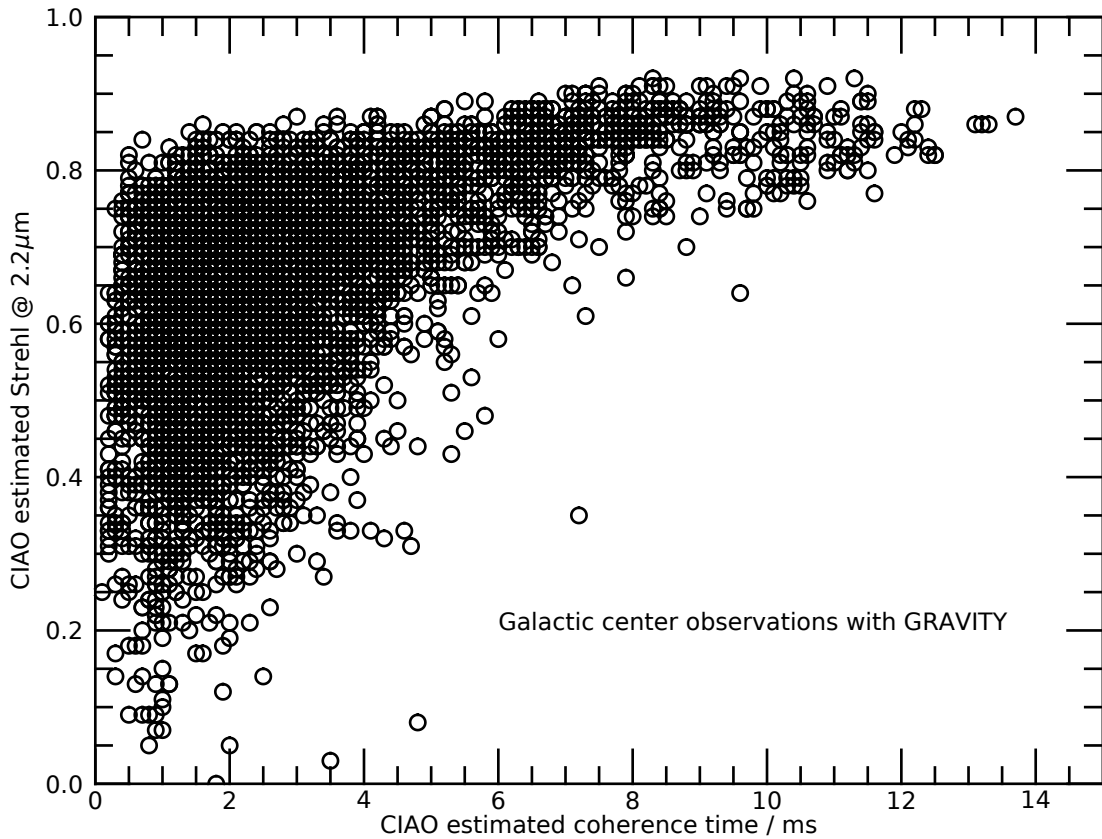

Supplement: s1 [file s1]

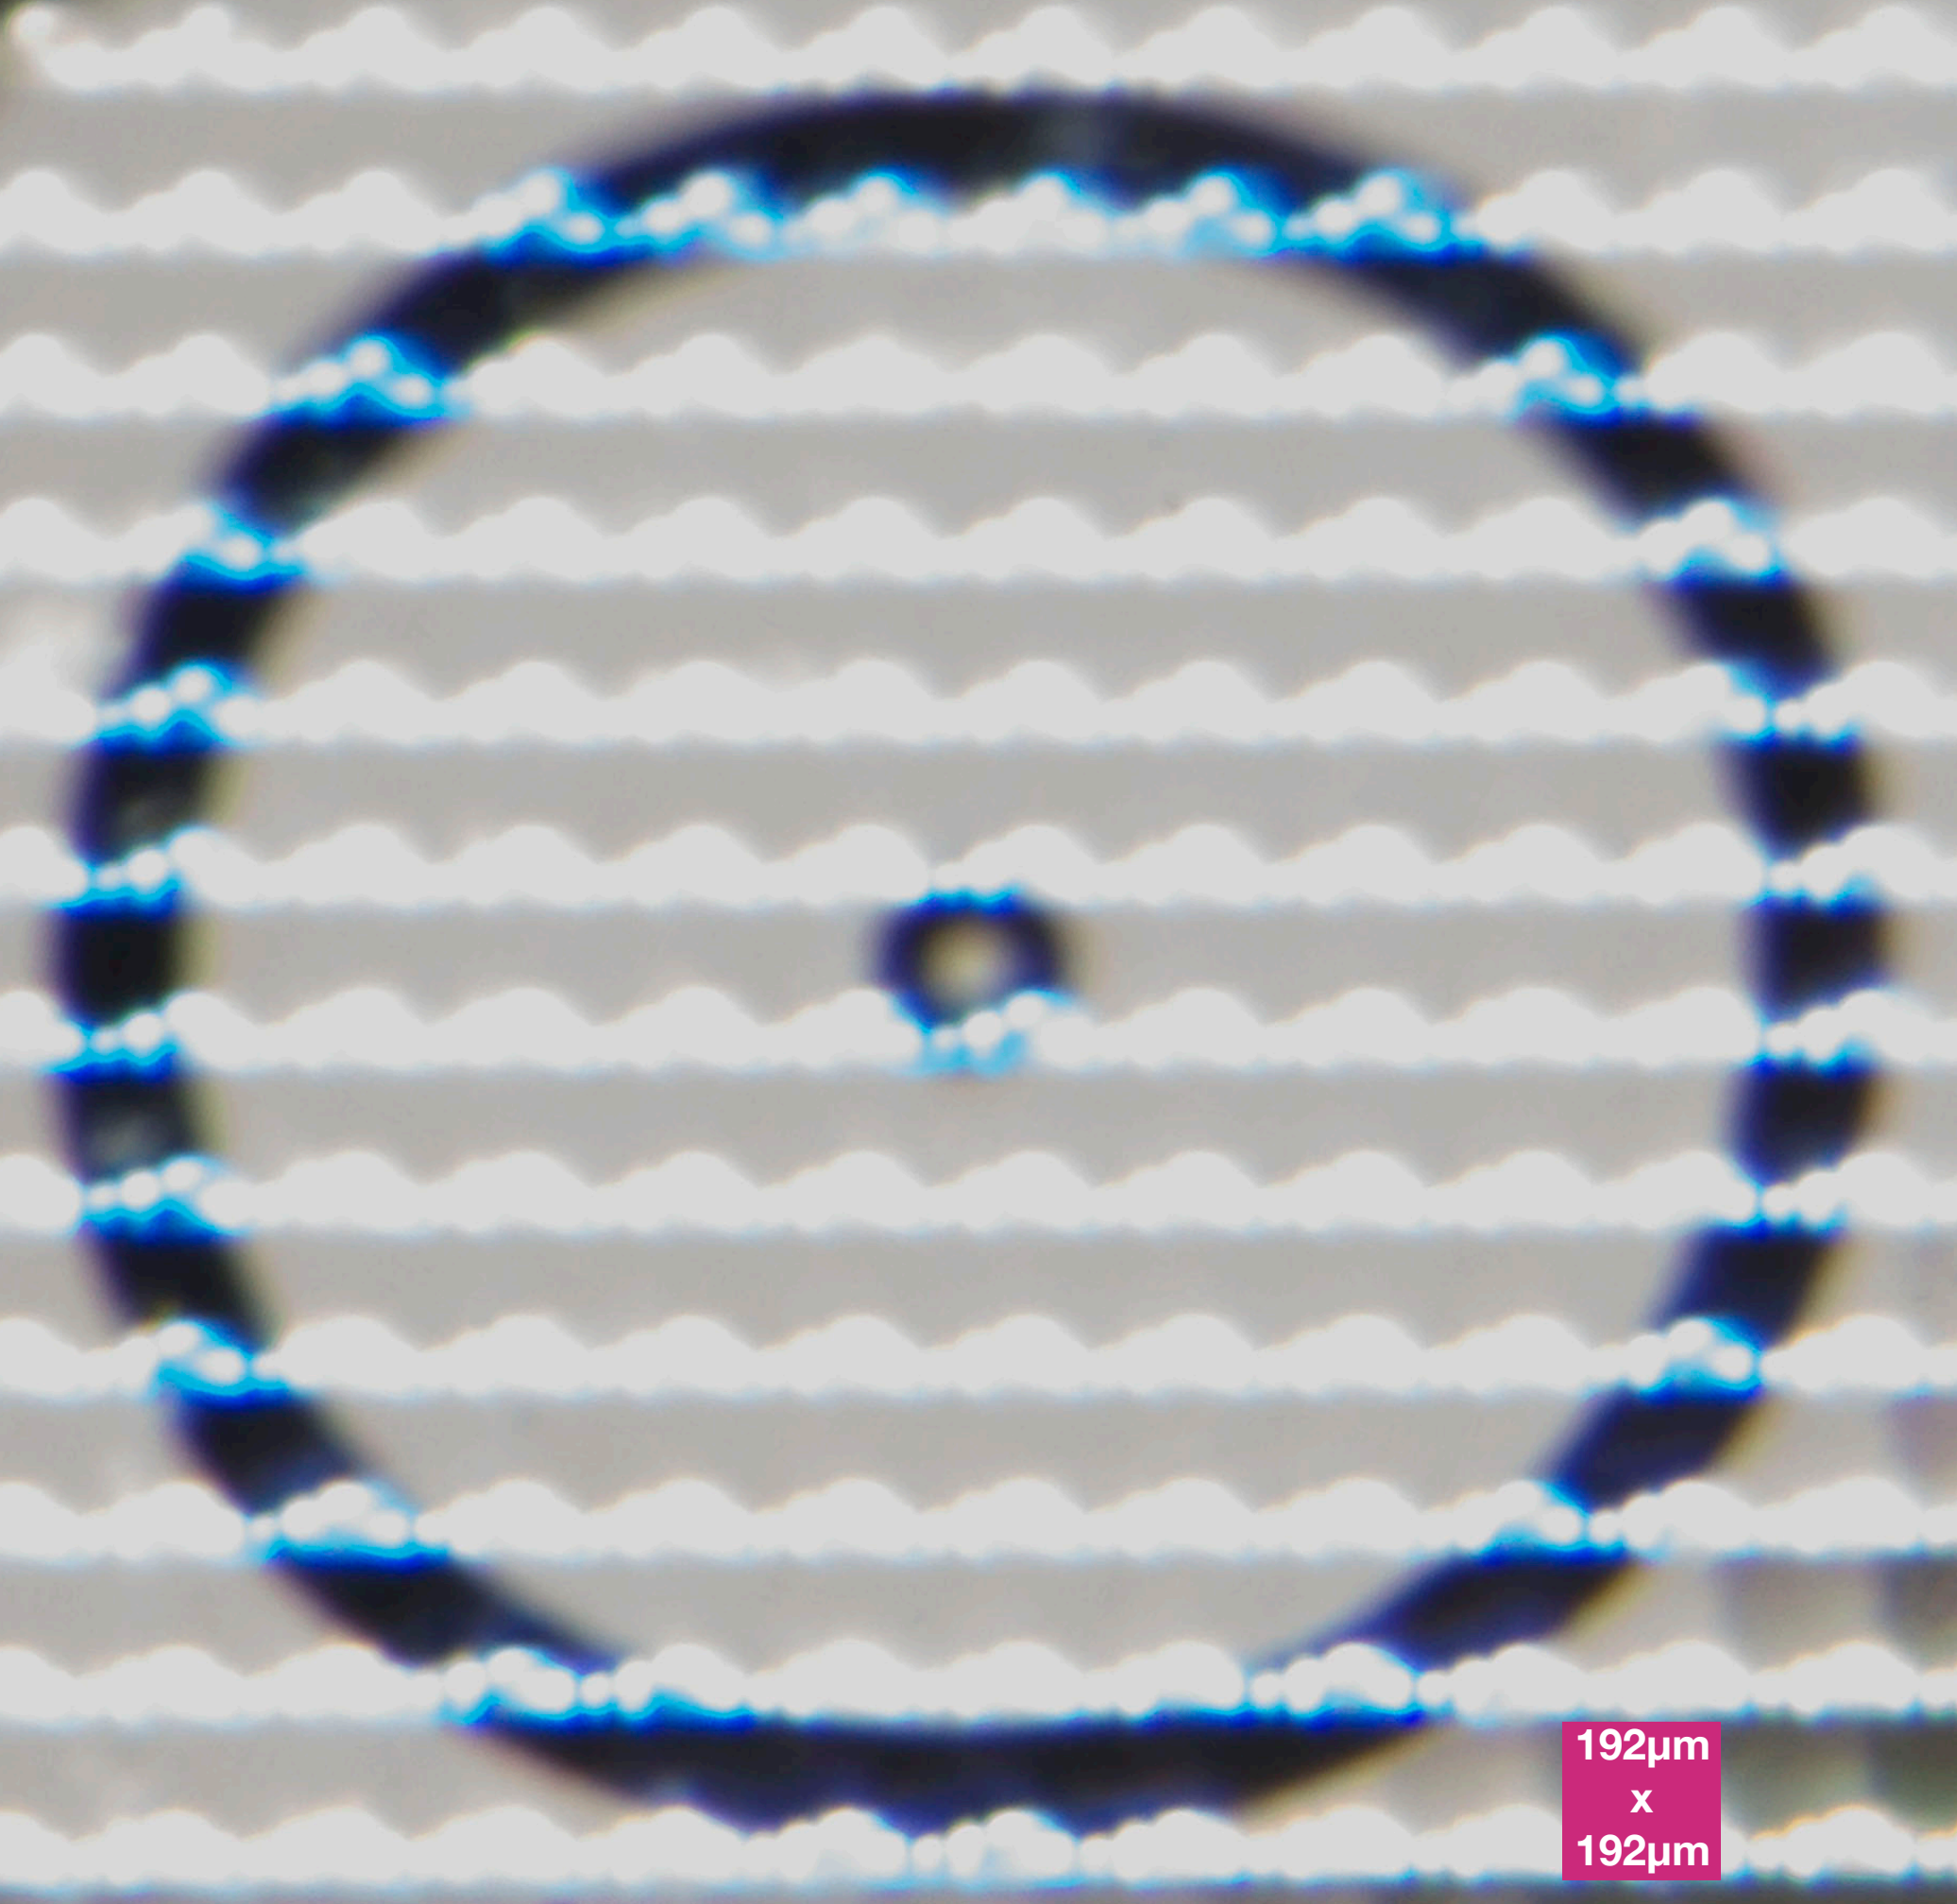

192μm  
x  
192μm

Supplement: s1 [file s1]

CIAO performance over 3 years (2017-2019)

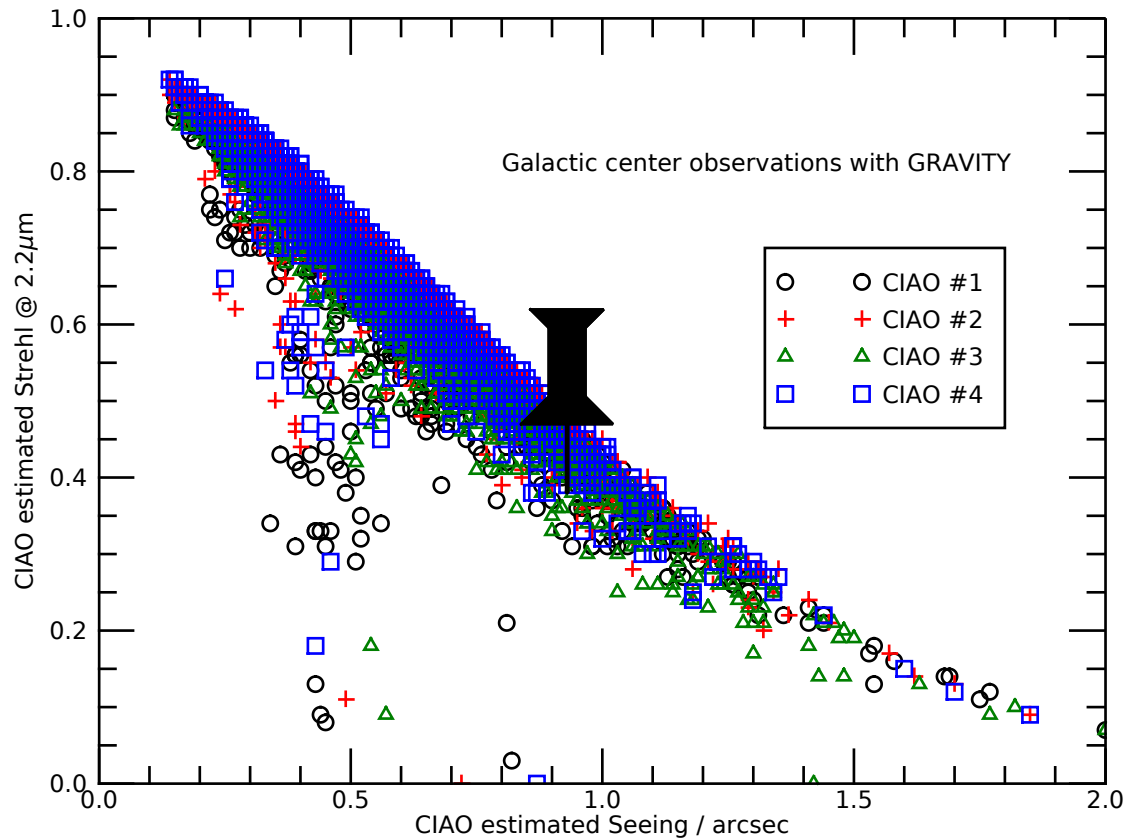

Supplement: s1 [file s1]

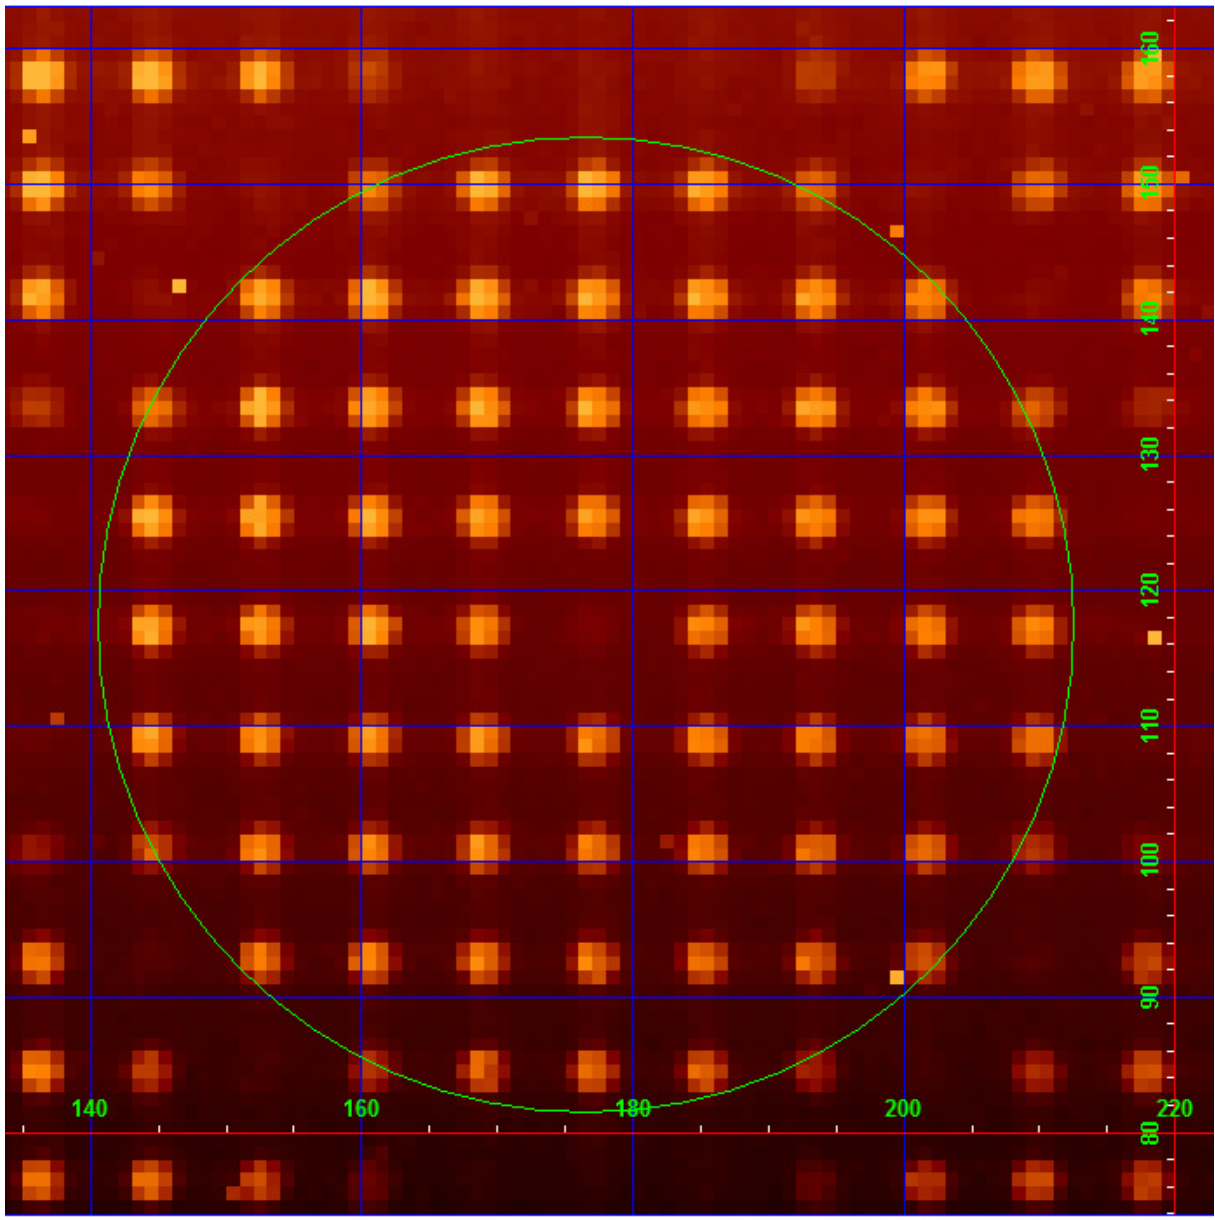

Supplement: s1 [file s1]
